# Supplementary material for: Chemical and U–Sr isotopic variations in stream and source waters of the Strengbach watershed (Vosges mountains, France)
Source: Copernicus journal article supplement (doi:10.5194/hess-18-3969-2014), 2014-10-07
Supplement: Supplementary file 1 [file hess-18-3969-2014-supplement.zip]

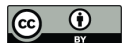

## *Supplement of*

# **Chemical and U–Sr isotopic variations in stream and source waters of the Strengbach watershed (Vosges mountains, France)**

**M. C. Pierret et al.**

*Correspondence to:* M. C. Pierret ([marie-claire.pierret@unistra.fr](mailto:marie-claire.pierret@unistra.fr))

- Supplement-Cover-Letter.pdf
- \_\_MACOSX
  - .\_Tables-PierretEtAl.xlsx
- hess-2114-24-Supplement.xlsx
