# Supplementary material for: Chemical and U–Sr isotopic variations in stream and source waters of the Strengbach watershed (Vosges mountains, France)
Source: Copernicus journal article supplement (doi:10.5194/hess-18-3969-2014), 2014-10-07
Supplement: Supplementary file 1 [file hess-2114-24-Supplement.xlsx]

## Sheet: Table S1
		Discharge	pH	Cond.	Na+	K+	Mg2+	Ca2+	Alc	Cl-	NO3-	SO42-	DOC	H4SiO4	Al	Mn	Fe	Ba	Rb	Sr	U	TDSw	TDS-ca
	date	l/s		µS/cm	mmol/l	mmol/l	mmol/l	mmol/l	meq/l	mmol/l	mmol/l	mmol/l	ppm	mmol/l	ppm	ppm	ppm	ppb	ppb	ppb	ppb	mg/l	mg/l
Spring Collector CR	2004-07-12		5.66	35.5	0.092	0.025	0.018	0.07	0.049	0.057	0.058	0.066	0.47	0.157	0.02	0.01	0.01	79.56	3.02	10.12	0.24	21.35	6.44
CR	2004-09-28		5.74	34.9	0.096	0.02	0.018	0.074	0.05	0.053	0.061	0.066	0.45	0.157	0.05	0.01	0.00	84.00	3.44	11.03	0.23	21.52	6.49
CR	2004-11-02		5.84	30.3	0.083	0.02	0.019	0.077	0.041	0.053	0.073	0.062	0.78	0.132	0.06	0.01	0.00	66.00	3.18	11.66	0.24	21.13	6.32
CR	2004-12-13		6.50	33.4	0.089	0.02	0.018	0.074	0.041	0.055	0.066	0.066	0.53	0.145	0.04	0.01	0.00	74.75	3.07	11.21	0.24	21.16	6.32
CR	2005-01-24		6.41	32.0	0.082	0.018	0.018	0.073	0.032	0.052	0.066	0.063	0.64	0.13	0.03	0.01	0.00	78.23	2.77	12.63	0.18	19.92	6.03
CR	2005-03-29		5.91	32.1	0.079	0.019	0.018	0.072	0.033	0.051	0.063	0.064	0.68	0.119	0.07	0.01	0.01	66.43	2.61	12.49	0.19	19.75	5.96
CR	2005-05-03		5.92	31.3	0.085	0.019	0.017	0.069	0.039	0.051	0.058	0.062	0.6	0.129	< 0.01	0.00	0.05	73.47	2.42	10.12	0.14	19.64	6.00
CR	2005-05-31		6.17	31.5	0.085	0.018	0.018	0.071	0.041	0.050	0.057	0.063	0.63	nd	< 0.01	0.00	0.02	78.79	2.90	12.35	0.05	19.55	5.96
CR	2005-07-11		6.33	30.5	0.086	0.018	0.016	0.068	0.045	0.047	0.052	0.061	0.44	0.152	< 0.01	0.00	0.04	83.05	2.82	11.40	0.15	19.37	5.93
CR	2005-08-22		6.49	29.9	0.092	0.018	0.017	0.07	0.041	0.051	0.063	0.063	0.5	0.159	0.05	0.01	0.01	74.37	2.85	10.21	0.23	20.39	6.15
CR	2005-10-03		6.50	30.1	0.089	0.019	0.018	0.069	0.05	0.051	0.055	0.062	0.53	0.153	0.02	0.01	0.01	75.77	3.09	11.33	0.17	20.29	6.10
CR	2006-02-07		6.38	31.8	0.092	0.019	0.017	0.073	0.05	0.060	0.058	0.064	0.62	0.154	0.04	0.01	0.01	76.68	3.03	11.00	0.22	21.19	6.30
CR	2006-04-03		6.05	31.4	0.075	0.021	0.018	0.071	0.022	0.049	0.074	0.064	0.84	0.114	0.06	0.01	0.01	60.27	2.86	11.86	0.20	19.63	5.91
CR	2006-07-10		6.18	32.6	0.086	0.018	0.016	0.068	0.045	0.049	0.055	0.059	1.67	0.148	0.02	0.01	0.01	69.84	2.67	10.23	0.16	19.43	5.90
CR	2006-08-21		6.12	30.0	0.084	0.018	0.017	0.065	0.039	0.049	0.059	0.059	0.59	0.137	nd	nd	nd	nd	nd	nd	nd	19.15	5.74
CR	2006-10-02		6.22	31.4	0.082	0.019	0.017	0.069	0.039	0.052	0.064	0.058	0.72	0.133	0.07	0.01	0.02	65.32	2.79	10.70	0.37	19.62	5.91
CR	2006-05-22		6.22	28.7	0.083	0.018	0.017	0.066	0.039	0.047	0.058	0.061	0.66	0.133	0.04	0.01	0.00	64.88	2.85	10.18	0.24	19.21	5.76
CR	Average		6.15	31.61	0.086	0.019	0.017	0.070	0.041	0.052	0.061	0.062	0.67	0.140	0.04	0.01	0.01	73.21	2.90	11.16	0.20	20.14	6.07
Spring CS1	2004-07-12	0.113	5.9	28.2	0.078	0.018	0.015	0.051	0.036	0.043	0.027	0.062	0.7	0.158	0.02	0.230	0.006	11.19	2.79	8.09	0.31	16.35	5.01
CS1	2004-09-28	0.148	5.82	26.8	0.078	0.014	0.016	0.053	0.035	0.037	0.029	0.061	0.62	0.154	0.08	0.220	0.000	12.00	2.79	7.83	0.24	16.04	4.95
CS1	2004-12-13	0.318	6.12	24.5	0.073	0.013	0.014	0.048	0.02	0.039	0.027	0.027	0.87	0.145	0.11	0.026	0.005	11.11	2.69	7.71	0.37	11.52	4.55
CS1	2005-03-29	1.156	5.22	25.2	0.067	0.014	0.014	0.044	0.008	0.04	0.035	0.061	nd	0.120	0.19	0.037	0.002	14.73	2.52	8.81	0.38	14.14	4.27
CS1	2005-05-03	0.560	6.19	22.1	0.068	0.012	0.013	0.043	0.017	0.036	0.024	0.058	0.74	0.133	0.03	0.006	0.098	12.78	2.38	7.70	0.25	13.50	4.25
CS1	2005-05-31	0.268	6.33	24.0	0.072	0.014	0.014	0.051	0.035	0.036	0.022	0.057	0.74	0.138	< 0.01	0.003	0.043	13.84	2.79	11.50	0.14	14.90	4.72
CS1	2005-07-11	0.076	6.44	25.5	0.076	0.014	0.014	0.053	0.042	0.036	0.024	0.059	0.64	0.157	0.03	0.004	0.029	13.84	2.85	9.54	0.19	15.85	4.89
CS1	2005-08-22	0.110	6.40	24.4	0.079	0.014	0.015	0.055	0.043	0.037	0.029	0.061	0.61	0.158	0.03	0.003	0.020	11.67	2.78	8.84	0.24	16.62	5.05
CS1	2005-10-03	0.192	6.50	24.0	0.075	0.014	0.015	0.049	0.029	0.046	0.026	0.058	0.66	0.151	0.04	0.023	0.000	12.66	2.78	8.73	0.15	15.27	4.69
CS1	2006-02-07	0.165	6.05	25.1	0.081	0.015	0.014	0.053	0.038	0.041	0.027	0.06	0.85	0.153	0.06	0.020	0.006	11.68	2.77	8.36	0.30	16.21	5.02
CS1	2006-04-03	1.672	5.33	25.5	0.068	0.015	0.015	0.044	0.008	0.044	0.038	0.062	1.75	0.113	0.26	0.044	0.015	17.94	2.98	8.54	0.53	14.64	4.37
CS1	2006-05-22	0.349	6.10	22.1	0.072	0.013	0.014	0.045	0.022	0.036	0.028	0.058	0.74	0.135	0.06	0.026	0.004	11.83	2.63	7.16	0.33	14.29	4.40
CS1	2006-07-10	0.092	6.48	25.8	0.075	0.013	0.014	0.047	0.037	0.035	0.022	0.057	0.48	0.153	0.01	0.021	0.000	10.29	2.48	7.72	0.18	14.89	4.55
CS1	2006-08-21	0.658	6.02	25.8	0.071	0.014	0.014	0.046	0.018	0.04	0.032	0.056	0.76	0.133	0.10	0.030	0.000	12.48	2.55	7.86	0.44	14.30	4.45
CS1	2006-10-02	0.635	5.85	25.7	0.071	0.013	0.014	0.044	0.014	0.044	0.033	0.057	0.78	0.135	0.12	0.032	0.000	14.07	2.75	8.31	0.51	14.24	4.33
CS1	Average		6.05	24.92	0.074	0.014	0.014	0.048	0.027	0.039	0.028	0.057	0.781	0.142	0.07	0.048	0.015	12.81	2.70	8.45	0.30	14.85	4.63
Spring CS2	2004-07-12	0.482	5.56	34.6	0.091	0.018	0.018	0.068	0.046	0.051	0.054	0.066	0.48	0.157	0.02	0.01	0.00	71.89	2.64	10.03	0.24	20.33	6.06
CS2	2004-09-28	0.535	5.58	34.4	0.094	0.018	0.019	0.07	0.048	0.052	0.058	0.064	0.42	0.155	0.06	0.01	0.00	76.00	3.00	10.14	0.20	20.72	6.23
CS2	2004-12-13	1.446	6.44	31.9	0.086	0.017	0.018	0.071	0.037	0.055	0.063	0.063	0.58	0.138	0.05	0.01	0.00	70.15	2.78	10.70	0.26	20.13	6.01
CS2	2005-05-03	2.500	6.23	28.8	0.078	0.016	0.017	0.067	0.037	0.05	0.05	0.06	0.74	0.124	< 0.01	0.00	0.05	72.40	2.29	10.00	0.13	18.44	5.64
CS2	2005-05-31	1.117	6.30	30.2	0.082	0.017	0.017	0.07	0.04	0.05	0.055	0.061	0.57	0.131	< 0.01	0.00	0.16	72.40	2.41	12.42	0.05	19.29	6.01
CS2	2005-07-11	0.246	6.27	30.5	0.087	0.016	0.017	0.067	0.042	0.049	0.054	0.06	0.54	0.149	< 0.01	0.00	0.05	71.34	2.28	10.03	0.20	19.21	5.87
CS2	2005-08-22	0.450	6.47	29.5	0.093	0.017	0.017	0.069	0.047	0.049	0.061	0.063	0.46	0.157	0.05	0.00	0.01	75.93	2.66	10.25	0.27	20.50	6.09
CS2	2006-02-07	0.678	6.24	32.3	0.092	0.019	0.018	0.069	0.047	0.055	0.06	0.062	0.51	0.151	0.03	0.01	0.01	79.16	2.76	11.43	0.18	20.63	6.17
CS2	2006-05-22	1.364	6.28	28.7	0.084	0.017	0.018	0.067	0.036	0.051	0.061	0.06	0.63	0.128	0.05	0.01	0.00	71.20	2.58	10.29	0.25	19.30	5.80
CS2	2006-04-03	7.156	6.04	31.2	0.073	0.018	0.018	0.073	0.031	0.049	0.067	0.064	0.88	0.107	0.06	0.01	0.00	59.98	2.45	10.60	0.18	19.65	5.81
CS2	2006-07-10	0.389	6.5	32.6	0.087	0.018	0.017	0.067	0.043	0.047	0.056	0.059	0.36	0.146	< 0.01	0.01	0.00	69.31	2.50	10.57	0.13	19.31	5.89
CS2	2006-08-21	2.978	6.3	33.1	0.084	0.017	0.018	0.068	0.039	0.056	0.063	0.058	0.55	0.134	0.06	0.01	0.00	70.57	2.54	10.76	0.30	19.65	5.84
CS2	2006-10-02	3.800	6.3	32.3	0.082	0.023	0.018	0.072	0.05	0.048	0.065	0.057	0.59	0.129	0.05	0.01	0.00	75.40	2.78	11.63	0.32	20.41	6.19
CS2	Average		6.19	31.55	0.086	0.018	0.018	0.069	0.042	0.051	0.059	0.061	0.562	0.139	0.04	0.01	0.02	71.98	2.59	10.68	0.21	19.81	5.97
Spring CS3	2004-12-13	0.265	6.65	36	0.097	0.022	0.017	0.083	0.051	0.05	0.071	0.071	0.44	0.159	0.01	0.00	0.15	20.39	4.10	10.85	0.25	22.99	7.08
CS3	2005-03-29	0.480	6.11	35.7	0.09	0.022	0.017	0.084	0.047	0.05	0.073	0.072	nd	0.142	0.03	0.00	0.00	24.44	3.99	13.44	0.21	22.81	6.80
CS3	2005-05-03	0.408	6.42	33.6	0.094	0.021	0.017	0.083	0.052	0.051	0.067	0.069	0.52	0.153	< 0.01	0.00	0.02	23.42	3.73	10.95	0.16	22.53	6.83
CS3	2005-05-31	0.246	6.24	34.1	0.094	0.021	0.016	0.08	0.053	0.049	0.064	0.068	0.5	0.154	< 0.01	0.00	0.02	25.55	3.88	11.65	0.07	22.10	6.69
CS3	2005-07-11	0.089	6.31	32.9	0.091	0.02	0.015	0.077	0.05	0.047	0.056	0.065	0.45	0.156	< 0.01	0.00	0.01	24.49	3.64	9.82	0.20	20.83	6.43
CS3	2005-08-22	0.086	6.52	31.7	0.097	0.021	0.016	0.08	0.054	0.049	0.062	0.07	0.53	0.164	< 0.01	0.00	0.00	22.18	4.06	10.47	0.27	22.32	6.75
CS3	2005-10-03	0.181	6.58	33.1	0.096	0.022	0.016	0.079	0.054	0.05	0.065	0.068	0.4	0.163	0.03	0.00	0.00	23.15	4.12	10.69	0.20	22.33	6.73
CS3	2006-02-07	0.164	6.53	33.9	0.098	0.022	0.015	0.078	0.054	0.051	0.064	0.068	0.51	0.164	0.01	0.00	0.01	22.60	4.12	11.15	0.21	22.28	6.70
CS3	2006-04-03	1.222	6.22	33.4	0.084	0.021	0.017	0.082	0.044	0.048	0.074	0.067	0.89	0.126	0.03	0.01	0.01	22.05	0.50	10.71	0.24	21.87	6.55
CS3	2006-05-22	0.229	6.42	32.2	0.093	0.021	0.016	0.078	0.051	0.048	0.068	0.068	0.54	0.152	0.01	0.00	0.00	16.86	3.31	8.27	0.17	22.09	6.57
CS3	2006-07-10	0.109	6.55	35.6	0.092	0.02	0.016	0.078	0.055	0.047	0.057	0.066	0.41	0.158	< 0.01	0.00	0.00	19.80	3.75	10.30	0.13	21.38	6.51
CS3	2006-08-21	0.268	6.44	33	0.095	0.021	0.016	0.078	0.05	0.048	0.07	0.066	0.5	0.159	0.01	0.00	0.00	21.18	3.94	10.57	0.31	22.03	6.62
CS3	2006-10-02	0.445	6.40	36.5	0.094	0.021	0.017	0.082	0.051	0.05	0.08	0.065	0.6	0.151	0.02	0.00	0.00	22.52	4.22	11.92	0.37	22.83	6.78
CS3	Average		6.41	33.98	0.093	0.02	0.016	0.080	0.051	0.05	0.07	0.07	0.52	0.15	0.01	0.00	0.02	22.20	3.64	10.83	0.21	22.18	6.70
Spring CS4	2004-12-13	0.314	6.58	35.70	0.096	0.024	0.020	0.078	0.05	0.056	0.071	0.071	0.66	0.152	0.04	0.01	0.00	127.41	3.21	12.10	0.26	23.00	6.85
CS4	2005-05-03	0.427	6.30	30.40	0.085	0.021	0.017	0.070	0.04	0.051	0.062	0.062	0.70	0.128	< 0.01	0.00	0.06	127.77	2.69	11.15	0.17	20.07	6.13
CS4	2005-05-31	0.268	6.29	32.70	0.089	0.021	0.018	0.072	0.04	0.050	0.062	0.064	0.64	0.141	< 0.01	0.00	0.01	137.35	2.86	12.25	0.09	20.68	6.29
CS4	2005-07-11	0.121	6.39	33.60	0.094	0.021	0.018	0.075	0.06	0.051	0.059	0.064	0.52	0.156	< 0.01	0.00	0.06	145.87	2.53	11.05	0.21	21.47	6.59
CS4	2005-08-22	0.170	6.68	31.90	0.097	0.022	0.019	0.077	0.06	0.052	0.064	0.065	0.61	0.163	0.04	0.00	0.01	154.38	2.93	12.11	0.29	22.69	6.75
CS4	2006-02-07	0.213	6.45	34.30	0.100	0.027	0.017	0.073	0.06	0.054	0.065	0.066	0.66	0.161	0.01	0.01	0.00	149.91	3.12	12.40	0.14	22.41	6.74
CS4	2006-04-03	0.265	5.69	32.50	0.080	0.024	0.019	0.070	0.02	0.054	0.088	0.059	1.20	0.105	0.09	0.02	0.01	96.46	2.78	10.66	0.24	20.41	6.12
CS4	2006-05-22	0.309	6.37	31.80	0.092	0.022	0.018	0.073	0.05	0.050	0.070	0.065	0.74	0.142	0.07	0.01	0.00	133.26	3.20	11.43	0.24	21.85	6.43
CS4	2006-07-10	0.157	6.60	35.50	0.092	0.021	0.018	0.073	0.06	0.050	0.055	0.064	0.41	0.155	0.01	0.00	0.00	148.84	2.78	11.76	0.17	21.43	6.40
CS4	2006-08-21	0.462	6.47	33.20	0.091	0.024	0.018	0.070	0.05	0.050	0.071	0.060	0.73	0.145	0.05	0.01	0.00	119.00	2.94	11.10	0.30	21.09	6.36
CS4	2006-10-02	0.772	6.50	33.50	0.087	0.024	0.018	0.070	0.05	0.054	0.065	0.061	1.00	0.140	0.07	0.01	0.58	115.10	3.19	11.92	0.45	21.33	6.85
CS4	Average		6.39	33.19	0.091	0.02	0.02	0.07	0.049	0.05	0.07	0.06	0.72	0.14	0.04	0.01	0.07	132.30	2.93	11.63	0.23	21.49	6.50
Spring BH	2004-02-02	nd	6.60	36.50	0.089	0.024	0.040	0.087	0.06	0.058	0.090	0.071	1.70	0.137	0.03	0.00	0.02	62.52	2.42	10.28	0.06	25.63	7.55
BH	2004-07-12	0.388	6.78	34.50	0.088	0.014	0.034	0.074	0.14	0.033	0.014	0.061	2.68	0.143	0.02	0.00	0.06	57.83	1.67	8.85	0.11	22.68	6.51
BH	2004-09-28	0.450	6.79	42.10	0.100	0.029	0.042	0.095	0.16	0.066	0.039	0.062	2.43	0.154	0.05	0.01	0.04	68.00	3.59	10.69	0.07	28.51	8.40
BH	2004-12-13	1.241	6.76	41.20	0.092	0.024	0.042	0.090	0.09	0.061	0.074	0.074	1.51	0.145	0.02	0.00	0.02	67.18	2.94	11.10	0.05	27.11	7.79
BH	2005-03-07	0.690	6.63	38.80	0.088	0.024	0.041	0.087	0.07	0.061	0.077	0.073	1.39	0.137	< 0.01	0.00	0.01	67.22	2.40	12.22	0.04	25.85	7.54
BH	2005-03-29	3.000	6.66	37.30	0.086	0.025	0.038	0.083	0.09	0.057	0.055	0.073	1.58	0.123	0.03	0.00	0.01	63.55	2.68	11.97	0.04	24.92	7.30
BH	2005-05-03	2.095	6.64	32.60	0.082	0.014	0.035	0.080	0.11	0.046	0.028	0.066	1.89	0.123	< 0.01	0.02	0.03	67.08	1.91	10.11	0.07	22.72	6.60
BH	2005-05-31	1.049	6.44	32.00	0.080	0.011	0.033	0.076	0.09	0.046	0.025	0.063	2.09	0.134	< 0.01	0.01	0.04	66.01	1.44	9.81	0.07	21.12	6.24
BH	2005-07-11	0.130	6.72	31.00	0.086	0.016	0.032	0.075	0.13	0.033	0.015	0.053	2.91	0.144	< 0.01	0.05	0.05	66.01	1.89	9.57	0.11	21.48	6.52
BH	2005-08-22	0.637	6.76	34.00	0.089	0.029	0.038	0.087	0.15	0.056	0.023	0.052	3.92	0.136	0.07	0.07	0.01	76.46	4.06	11.82	0.15	25.35	7.68
BH	2005-10-03	0.724	6.79	38.10	0.100	0.042	0.042	0.091	0.15	0.067	0.036	0.058	3.69	0.138	0.08	0.00	0.06	77.72	4.69	12.05	0.11	27.70	8.75
BH	2006-04-03	5.450	6.46	36.80	0.081	0.023	0.036	0.076	0.07	0.048	0.066	0.069	1.37	0.120	0.03	0.00	0.01	59.17	2.65	9.79	0.05	23.10	6.76
BH	2006-05-22	1.264	6.62	31.70	0.084	0.016	0.035	0.075	0.11	0.039	0.025	0.064	2.09	0.115	0.03	0.00	0.03	62.10	2.47	9.46	0.08	22.38	6.51
BH	2006-07-10	0.278	6.85	36.40	0.086	0.023	0.036	0.082	0.16	0.039	0.020	0.054	3.10	0.147	0.04	0.00	0.02	59.41	3.04	10.50	0.13	24.40	7.15
BH	2006-08-21	3.261	6.40	29.80	0.086	0.020	0.036	0.078	0.10	0.049	0.047	0.062	2.16	0.139	0.04	0.00	0.03	57.21	2.58	10.11	0.11	23.45	6.88
BH	2006-10-02	3.155	6.74	35.60	0.087	0.020	0.037	0.081	0.10	0.048	0.057	0.066	1.83	0.142	0.03	0.00	0.18	63.68	2.98	11.11	0.10	24.46	7.20
BH	Average		6.67	35.53	0.09	0.02	0.037	0.082	0.11	0.05	0.04	0.06	2.27	0.14	0.03	0.01	0.04	65.07	2.71	10.59	0.08	24.43	7.21
Spring RUZS	2004-09-28	0.206	6.28	18.30	0.089	0.006	0.010	0.036	0.06	0.020	0.000	0.030	9.05	0.103	0.24	0.03	0.46	20.00	1.33	5.01	0.35	11.08	4.49
RUZS	2004-12-13	0.299	5.77	26.30	0.093	0.005	0.015	0.051	0.01	0.046	0.002	0.002	2.47	0.154	0.07	0.01	0.11	26.24	1.08	7.77	0.11	7.81	4.95
RUZS	2005-03-29	1.300	5.82	26.00	0.084	0.013	0.015	0.050	0.02	0.052	0.004	0.071	2.83	0.121	0.10	0.01	0.04	31.80	2.31	9.16	0.14	14.85	4.93
RUZS	2005-05-03	1.190	5.94	16.00	0.058	0.002	0.010	0.040	0.04	0.004	0.000	0.042	6.00	0.048	< 0.01	0.15	0.18	29.81	0.45	6.86	0.38	9.63	3.47
RUZS	2005-05-31	0.525	5.90	13.20	0.038	0.002	0.009	0.042	0.03	0.021	0.000	0.013	9.38	0.045	< 0.01	0.21	0.23	28.75	0.40	7.63	0.42	6.67	3.11
RUZS	2005-07-11	0.057	6.44	13.40	0.053	0.004	0.009	0.035	0.04	0.008	0.000	0.019	7.24	0.027	0.01	0.20	0.20	25.55	0.68	5.71	0.44	7.72	3.22
RUZS	2005-08-22	0.390	6.04	28.80	0.119	0.018	0.016	0.060	0.04	0.092	0.001	0.059	6.74	0.079	0.15	0.15	0.01	40.86	3.73	10.28	0.26	17.48	6.30
RUZS	2005-10-03	0.284	6.10	24.70	0.100	0.013	0.013	0.048	0.03	0.051	0.006	0.057	6.39	0.108	0.18	0.00	0.12	35.36	2.70	8.29	0.31	14.60	5.23
RUZS	2006-03-20	1.140	5.75	32.20	0.090	0.020	0.021	0.066	0.02	0.062	0.050	0.070	3.27	0.150	0.08	0.01	0.03	43.19	2.90	10.70	0.12	19.05	6.11
RUZS	2006-04-03	3.395	5.59	29.50	0.082	0.019	0.017	0.056	0.01	0.053	0.029	0.068	3.00	0.116	0.14	0.01	0.03	41.64	2.10	8.53	0.23	16.15	5.38
RUZS	2006-04-18	2.805	5.55	24.60	0.078	0.015	0.015	0.049	0.01	0.047	0.027	0.063	3.07	0.108	0.13	0.01	0.05	36.96	2.06	8.43	0.22	14.87	4.82
RUZS	2006-05-22	0.139	6.44	15.30	0.063	0.005	0.011	0.041	0.06	0.010	0.020	0.026	8.20	0.040	0.21	0.02	0.24	26.57	1.08	6.34	0.46	11.04	3.82
RUZS	2006-07-10	0.036	6.72	20.30	0.060	0.004	0.016	0.063	0.12	0.009	0.002	0.011	10.96	0.101	0.16	0.02	0.14	19.80	0.99	9.92	0.49	13.20	4.66
RUZS	2006-08-21	0.501	6.10	44.00	0.098	0.005	0.011	0.046	0.03	0.032	0.000	0.054	7.26	0.086	0.16	0.02	0.13	30.40	1.06	7.42	0.33	12.87	4.74
RUZS	2006-10-02	1.457	6.22	21.20	0.088	0.006	0.012	0.042	0.04	0.042	0.000	0.045	6.31	0.121	0.16	0.02	0.03	27.07	1.48	7.21	0.37	12.33	4.34
RUZS	Average		6.03	23.96	0.079	0.01	0.01	0.05	0.04	0.04	0.01	0.04	5.94	0.09	0.11	0.06	0.11	31.71	1.64	8.16	0.31	12.73	4.65
Spring RH	2004-07-12	0.160	5.89	46.50	0.092	0.030	0.036	0.103	0.06	0.060	0.119	0.080	0.58	0.144	0.02	0.00	0.00	136.18	3.73	14.71	0.18	29.01	8.38
RH	2004-09-28	0.200	6.03	50.50	0.098	0.031	0.040	0.116	0.07	0.060	0.158	0.076	0.60	0.146	0.05	0.00	0.00	163.00	4.15	16.33	0.14	32.28	9.18
RH	2004-11-02	2.030	6.34	41.20	0.089	0.031	0.035	0.105	0.06	0.073	0.112	0.080	0.88	0.133	0.06	0.00	0.00	144.44	4.57	16.08	0.19	28.98	8.40
RH	2004-12-13	0.434	6.54	44.70	0.091	0.030	0.035	0.103	0.05	0.069	0.111	0.111	0.82	0.141	0.05	0.00	0.00	129.97	3.80	14.95	0.16	31.14	8.33
RH	2005-01-24	2.098	6.21	39.70	0.084	0.028	0.031	0.091	0.03	0.066	0.085	0.080	0.89	0.124	0.07	0.00	0.00	136.78	3.46	15.43	0.15	24.74	7.50
RH	2005-03-07	0.430	6.34	39.80	0.087	0.028	0.031	0.090	0.03	0.063	0.093	0.081	0.76	0.136	0.03	0.00	0.00	124.00	3.52	16.33	0.13	24.91	7.55
RH	2005-03-29	1.062	6.23	40.30	0.083	0.028	0.031	0.090	0.04	0.058	0.087	0.081	0.84	0.117	0.06	0.00	0.00	126.12	3.41	15.84	0.14	25.08	7.44
RH	2005-05-03	0.907	6.26	38.20	0.082	0.027	0.030	0.090	0.04	0.058	0.079	0.081	0.88	0.127	< 0.01	0.01	0.04	132.03	3.36	14.05	0.14	24.64	7.40
RH	2005-05-31	0.515	6.40	38.80	0.082	0.024	0.030	0.089	0.05	0.054	0.086	0.076	0.74	0.129	< 0.01	0.00	0.07	128.83	3.45	13.60	0.07	24.44	7.27
RH	2005-07-11	0.324	6.53	41.10	0.086	0.027	0.031	0.096	0.05	0.055	0.095	0.075	0.62	0.138	< 0.01	0.00	0.04	140.55	3.54	15.45	0.16	25.84	7.76
RH	2005-08-22	0.313	6.61	39.50	0.090	0.029	0.034	0.100	0.07	0.055	0.107	0.075	0.73	0.143	0.05	0.00	0.00	144.26	3.80	15.20	0.25	27.92	8.13
RH	2005-10-03	0.138	6.56	40.80	0.088	0.030	0.033	0.098	0.07	0.057	0.098	0.076	0.75	0.145	0.04	0.00	0.01	145.49	3.93	15.56	0.19	27.60	8.02
RH	2006-02-07	0.313	6.28	38.50	0.086	0.028	0.030	0.089	0.05	0.060	0.080	0.081	0.90	0.144	0.02	0.00	0.01	129.12	3.58	13.95	0.16	25.09	7.47
RH	2006-04-03	2.130	6.30	41.90	0.085	0.030	0.031	0.090	0.04	0.054	0.107	0.074	0.95	0.105	0.06	0.00	0.01	131.03	3.44	13.28	0.19	25.63	7.56
RH	2006-05-22	0.492	6.39	37.20	0.085	0.028	0.030	0.088	0.05	0.050	0.094	0.075	0.81	0.129	0.04	0.00	0.00	127.92	3.86	13.44	0.20	25.13	7.39
RH	2006-07-10	0.213	6.55	42.20	0.086	0.028	0.031	0.093	0.07	0.053	0.082	0.077	0.60	0.139	0.01	0.00	0.00	118.81	3.41	13.85	0.10	25.87	7.64
RH	2006-08-21	1.244	6.40	60.30	0.090	0.029	0.032	0.095	0.06	0.054	0.119	0.067	0.87	0.135	0.05	0.00	0.00	134.40	3.51	14.42	0.23	27.07	7.87
RH	2006-10-02	1.078	6.48	42.40	0.088	0.032	0.033	0.098	0.06	0.059	0.115	0.071	0.88	0.132	0.05	0.00	0.00	145.20	3.81	15.73	0.28	27.76	8.09
RH	Average		6.35	42.42	0.087	0.03	0.03	0.10	0.05	0.06	0.10	0.08	0.78	0.13	0.04	0.00	0.01	135.45	3.69	14.90	0.17	26.84	7.85
Spring SG	2004-07-12	0.030	6.94	54.90	0.095	0.021	0.078	0.118	0.16	0.043	0.142	0.082	0.94	0.128	0.02	0.00	0.02	122.70	5.22	12.65	0.03	37.60	9.73
SG	2004-09-28	0.032	6.16	59.40	0.103	0.023	0.082	0.125	0.12	0.050	0.187	0.086	0.80	0.141	0.02	0.01	0.01	147.00	5.75	14.35	0.02	39.36	10.36
SG	2004-12-13	0.007	6.61	52.80	0.094	0.026	0.072	0.111	0.11	0.060	0.137	0.137	1.03	0.142	0.02	0.02	0.03	119.83	6.37	13.46	0.01	39.68	9.50
SG	2005-03-29	0.064	6.27	44.30	0.074	0.019	0.060	0.095	0.08	0.037	0.125	0.080	0.84	0.122	0.03	0.00	0.01	115.78	4.22	13.57	0.01	29.40	7.80
SG	2005-05-03	0.030	6.58	46.50	0.085	0.020	0.067	0.106	0.11	0.046	0.122	0.082	0.82	0.127	< 0.01	0.01	0.01	138.42	4.44	12.75	0.01	32.34	8.70
SG	2005-05-31	0.007	6.47	48.10	0.087	0.021	0.066	0.107	0.12	0.045	0.127	0.080	1.02	0.127	< 0.01	0.03	0.09	132.03	5.24	13.10	0.02	32.83	8.89
SG	2005-07-11	0.025	6.31	51.40	0.093	0.023	0.064	0.115	0.12	0.044	0.145	0.080	1.39	0.136	0.02	0.03	0.04	149.07	5.54	14.20	0.02	34.48	9.32
SG	2005-08-22	0.010	6.65	47.30	0.091	0.025	0.073	0.117	0.14	0.042	0.138	0.076	nd	0.123	0.07	0.03	0.10	151.52	6.55	15.41	0.08	35.62	9.71
SG	2005-10-03	0.024	6.67	49.70	0.092	0.025	0.072	0.112	0.14	0.049	0.134	0.082	1.71	0.134	0.04	0.00	0.04	138.88	6.24	14.48	0.04	35.45	9.45
SG	2006-05-22	0.014	6.68	47.90	0.090	0.021	0.070	0.111	0.11	0.040	0.160	0.079	0.79	0.124	0.02	0.00	0.01	112.00	5.44	13.42	0.03	34.75	9.12
SG	2006-04-03	0.101	6.17	43.30	0.072	0.019	0.060	0.091	0.07	0.034	0.149	0.071	0.94	0.112	0.02	0.01	0.00	120.89	3.89	10.92	0.01	28.68	7.57
SG	2006-08-21	0.031	6.55	23.80	0.087	0.020	0.070	0.110	0.10	0.042	0.166	0.075	0.99	0.131	0.02	0.00	0.01	134.10	4.57	13.51	0.02	33.96	8.98
SG	2006-10-02	0.034	6.77	51.00	0.087	0.021	0.071	0.112	0.11	0.050	0.169	0.076	0.82	0.137	0.02	0.00	0.07	148.10	5.11	14.73	0.01	35.35	9.19
SG	Average		6.49	47.13	0.088	0.02	0.069	0.109	0.11	0.04	0.15	0.084	1.01	0.13	0.02	0.01	0.03	133.97	5.28	13.66	0.02	34.32	9.05
Spring SH	2004-09-28	0.033	5.02	21.80	0.084	0.016	0.007	0.023	0.00	0.049	0.004	0.033	9.78	0.144	0.44	0.04	0.25	20.00	4.38	3.71	0.34	9.16	3.99
SH	2004-11-02	2.252	5.24	18.10	0.078	0.013	0.008	0.025	0.00	0.053	0.007	0.046	3.34	0.134	0.22	0.02	0.06	19.00	4.02	4.42	0.30	10.58	3.64
SH	2004-12-13	0.074	5.23	22.00	0.083	0.017	0.009	0.028	0.00	0.051	0.012	0.012	3.47	0.148	0.24	0.03	0.07	22.11	3.89	4.77	0.26	8.13	4.08
SH	2005-01-24	2.000	5.29	20.60	0.075	0.015	0.009	0.028	0.00	0.051	0.016	0.045	2.23	0.129	0.19	0.02	0.03	20.13	3.07	5.02	0.18	11.05	3.76
SH	2005-03-29	1.280	5.00	24.10	0.074	0.019	0.010	0.031	0.00	0.048	0.023	0.045	4.65	0.121	0.27	0.03	0.14	20.08	4.97	5.72	0.24	11.46	4.14
SH	2005-05-03	0.324	5.05	20.20	0.072	0.019	0.008	0.025	0.00	0.048	0.009	0.035	7.21	0.092	0.03	0.21	0.35	20.23	5.17	4.30	0.33	9.46	4.00
SH	2005-05-31	0.027	5.56	18.80	0.076	0.017	0.007	0.024	0.01	0.045	0.009	0.038	4.15	0.124	0.03	0.30	0.48	26.62	3.59	4.53	0.37	10.32	4.10
SH	2005-08-22	0.231	5.16	19.50	0.075	0.016	0.008	0.031	0.01	0.039	0.015	0.033	9.63	0.114	0.40	0.30	0.03	18.32	4.13	4.99	0.56	10.17	3.89
SH	2005-10-03	0.278	5.25	19.70	0.080	0.019	0.008	0.025	0.01	0.049	0.008	0.038	6.16	0.137	0.28	0.03	0.18	21.52	5.55	4.86	0.42	10.35	4.04
SH	2006-02-07	0.260	5.30	23.80	0.087	0.022	0.009	0.031	0.01	0.053	0.019	0.053	2.80	0.154	0.23	0.04	0.03	28.94	4.11	5.39	0.27	13.08	4.45
SH	2006-04-03	5.711	5.36	20.80	0.068	0.014	0.008	0.024	0.01	0.044	0.019	0.039	3.31	0.106	0.28	0.02	0.03	19.32	2.97	4.08	0.29	10.15	3.39
SH	2006-05-22	0.125	5.45	18.20	0.076	0.018	0.007	0.024	0.01	0.043	0.012	0.041	3.55	0.117	0.29	0.02	0.06	11.00	4.11	4.12	0.36	10.55	3.71
SH	2006-08-21	0.554	5.60	15.40	0.077	0.013	0.008	0.026	0.01	0.045	0.005	0.042	4.01	0.130	0.25	0.03	0.06	20.56	2.97	4.39	0.43	10.18	3.66
SH	2006-10-02	0.883	5.61	18.50	0.076	0.011	0.007	0.022	0.01	0.051	0.004	0.040	3.77	0.134	0.24	0.02	0.00	20.60	2.95	4.29	0.48	9.86	3.31
SH	Average		5.29	20.11	0.077	0.02	0.008	0.026	0.01	0.05	0.01	0.04	4.86	0.13	0.24	0.08	0.13	20.60	3.99	4.61	0.35	10.32	3.87
Outlet RS	2004-02-02	nd	6.19	30.10	0.083	0.020	0.024	0.069	0.03	0.056	0.059	0.068	1.85	0.131	0.05	0.01	0.02	67.31	2.41	10.46	0.14	19.99	6.15
RS	2004-07-12	4.58	6.66	29.20	0.081	0.016	0.020	0.060	0.07	0.044	0.026	0.059	1.99	0.132	0.02	0.01	0.05	57.08	1.76	9.07	0.19	18.29	5.52
RS	2004-09-28	5.45	6.53	32.60	0.090	0.018	0.024	0.070	0.07	0.053	0.044	0.061	1.80	0.140	0.06	0.01	0.04	69.00	2.96	11.50	0.15	20.77	6.29
RS	2004-11-02	59.30	6.38	30.10	0.084	0.020	0.025	0.073	0.04	0.057	0.068	0.063	1.55	0.134	0.05	0.01	0.02	71.65	3.19	11.05	0.12	21.07	6.35
RS	2004-12-13	12.00	6.49	34.30	0.088	0.019	0.025	0.075	0.04	0.061	0.061	0.062	1.13	0.143	0.03	0.01	0.02	68.76	2.59	11.10	0.08	20.90	6.49
RS	2005-01-24	42.60	6.38	33.10	0.083	0.021	0.025	0.073	0.03	0.057	0.068	0.067	1.30	0.133	0.03	0.00	0.01	78.96	2.64	12.29	0.08	20.96	6.36
RS	2005-03-07	8.37	6.25	32.40	0.085	0.019	0.023	0.070	0.03	0.057	0.059	0.068	1.10	0.135	0.02	0.00	0.02	69.00	2.43	13.16	0.07	20.36	6.16
RS	2005-03-21	78.50	6.14	32.40	0.079	0.022	0.024	0.071	0.03	0.055	0.075	0.063	1.63	0.121	nd	nd	nd	nd	nd	nd	nd	20.29	6.18
RS	2005-03-29	48.70	6.22	31.90	0.079	0.020	0.022	0.068	0.03	0.056	0.059	0.065	1.28	0.122	0.03	0.00	0.01	74.63	2.74	12.00	0.08	19.58	5.94
RS	2005-05-03	22.70	6.31	28.00	0.076	0.015	0.021	0.063	0.05	0.044	0.038	0.060	1.99	0.104	< 0.01	0.02	0.05	70.27	2.08	10.03	0.13	17.84	5.48
RS	2005-05-31	11.10	6.40	28.60	0.078	0.013	0.021	0.065	0.05	0.044	0.038	0.058	1.78	0.119	< 0.01	0.01	0.03	68.14	1.95	13.35	0.12	17.60	5.45
RS	2005-07-11	3.85	6.51	28.20	0.080	0.014	0.020	0.063	0.07	0.041	0.028	0.056	1.85	0.134	< 0.01	0.03	0.04	70.27	2.35	10.65	0.18	17.99	5.52
RS	2005-08-22	6.88	6.52	29.00	0.089	0.020	0.023	0.069	0.07	0.056	0.032	0.057	2.92	0.127	0.06	0.07	0.01	68.03	3.14	10.04	0.22	19.91	6.24
RS	2005-10-03	14.00	6.56	29.10	0.085	0.022	0.022	0.065	0.06	0.057	0.035	0.057	2.73	0.130	0.07	0.00	0.04	69.48	3.37	11.16	0.23	19.21	6.07
RS	2005-11-28	4.70	6.16	32.20	0.089	0.020	0.024	0.070	0.06	0.059	0.049	0.067	1.20	0.143	nd	nd	nd	nd	nd	nd	nd	21.08	6.21
RS	2006-02-07	8.05	6.44	33.20	0.089	0.021	0.024	0.075	0.04	0.057	0.059	0.071	1.20	0.143	0.03	0.00	0.02	74.11	2.66	11.50	0.08	21.48	6.55
RS	2006-03-20	22.97	6.52	32.10	0.084	0.022	0.023	0.068	0.03	0.056	0.060	0.067	1.22	0.131	nd	nd	nd	nd	nd	nd	nd	20.06	6.16
RS	2006-04-03	127.50	5.70	30.50	0.076	0.024	0.020	0.064	0.02	0.052	0.072	0.061	1.64	0.111	0.09	0.02	0.01	73.05	2.96	10.86	0.14	18.93	5.82
RS	2006-05-22	10.70	6.45	28.00	0.082	0.017	0.022	0.064	0.05	0.045	0.041	0.062	1.72	0.115	0.07	0.01	0.03	65.82	2.80	10.44	0.15	18.97	5.75
RS	2006-07-10	3.60	6.45	30.10	0.084	0.017	0.021	0.064	0.07	0.046	0.033	0.057	1.59	0.135	0.03	0.01	0.03	59.80	2.59	9.68	0.17	18.85	5.79
RS	2006-08-21	22.40	6.01	22.90	0.098	0.005	0.012	0.047	0.04	0.030	0.001	0.056	7.03	0.089	0.05	0.01	0.03	70.00	2.45	10.54	0.18	13.23	4.71
RS	2006-10-02	15.50	6.30	31.60	0.083	0.019	0.022	0.067	0.04	0.052	0.057	0.059	1.59	0.134	0.05	0.01	0.00	71.59	2.59	10.62	0.17	19.65	5.96
RS	Average		6.34	30.44	0.084	0.018	0.022	0.067	0.05	0.05	0.05	0.06	1.91	0.128	0.04	0.01	0.03	69.31	2.61	11.03	0.14	19.41	5.96
atmopsheric inputs	Average data
Rain	2004-2006		5.21	15.73	0.011	0.004	0.002	0.005	0.01	0.012	0.038	0.016	1.01	0.000	0.01	0.01	0.01	3.77	1.47	0.85	0.01
Throughfalls spruces	2004-2006		5.18	34.11	0.048	0.069	0.011	0.027	0.01	0.058	0.074	0.041	8.80	0.003	0.10	0.31	0.02	9.34	13.99	3.37	0.01
Througfalls beeches	2004-2006		5.75	23.14	0.026	0.074	0.006	0.010	0.04	0.029	0.033	0.022	6.42	0.005	0.02	0.02	0.03	11.41	28.70	1.02	0.00

## Sheet: Table S2
Samples	date	87Sr/86Sr	2sigma	234U/238U	2sigma	altitude
						(m)
Spring CS1	2004-09-28	0.72573	0.00002	0.880	0.001	1080
CS1	2004-12-13	0.72656	0.00004	0.875	0.005	1080
CS1	2005-03-29	0.72780	0.00001	0.892	0.003	1080
CS1	2006-05-22	0.72650	0.00001	0.886	0.002	1080
CS1	Average	0.72665		0.883
Spring CS2	2005-05-03	0.72546	0.00001			1055
CS2	2005-07-11	0.72376	0.00001			1055
CS2	2006-05-22	0.72544	0.00001	0.875		1055
CS2	2006-10-02	0.72515	0.00001			1055
CS2	Average	0.72495		0.875
Spring CS3	2004-12-13	0.72325	0.00002	0.823	0.003	1098
CS3	2005-03-29	0.72328	0.00001	0.827	0.003	1098
CS3	2005-07-11	0.72314	0.00002			1098
CS3	2006-05-22	0.72325	0.00001	0.819	0.004	1098
CS3	Average	0.72323		0.823
Spring CS4	2005-05-03	0.72490	0.00002	0.866	0.003	1050
CS4	2005-07-11	0.72375	0.00001			1050
CS4	2006-05-22	0.72353	0.00001	0.867	0.002	1050
CS4	2006-10-02	0.72548	0.00001			1050
CS4	Average	0.72442		0.867
Spring BH	2004-07-12	0.72262	0.00002	1.106	0.005	915
BH	2004-12-13	0.72289	0.00002	1.1	0.003	915
BH	2005-03-29	0.72359	0.00001	1.101	0.003	915
BH	2005-05-03	0.72340	0.00001	1.1	0.003	915
BH	2005-05-31	0.72319	0.00001	1.112	0.003	915
BH	2005-07-11	0.72279	0.00001	1.101	0.003	915
BH	2005-08-22	0.72287	0.00001	1.106	0.003	915
BH	2005-10-03	0.72307	0.00001	1.105	0.003	915
BH	2006-05-22	0.72334	0.00002	1.099	0.004	915
BH	Average	0.723084		1.103
Spring RUZS	2004-12-13	0.72700	0.00002	0.945	0.004	950
RUZS	2005-03-29	0.72665	0.00001	0.941	0.003	950
RUZS	2006-05-22	0.72669	0.00001	0.949	0.003	950
RUZS	Average	0.72678		0.945
Spring RH	2004-09-28	0.72206	0.00008	0.996	0.003	980
RH	2004-12-13	0.72240	0.00002	0.991	0.004	980
RH	2005-03-29	0.72257	0.00002	0.993	0.005	980
RH	2006-05-22	0.72242	0.00001	0.991	0.004	980
RH	Average	0.72236		0.993
Spring SG	2004-09-28	0.72353	0.00002	0.91	0.004	1093
SG	2004-12-13	0.72328	0.00007	0.93	0.003	1093
SG	2005-03-29	0.72352	0.00002	0.923	0.004	1093
SG	2006-05-22	0.72354	0.00002	0.927	0.002	1093
SG	Average	0.72347		0.923
Spring SH	2004-09-28	0.72749	0.00003	0.916	0.003	1050
SH	2004-12-13	0.72720	0.00009	0.915	0.003	1050
SH	2005-03-29	0.72801	0.00002	0.914	0.004	1050
SH	2005-05-03	0.72798	0.00001			1050
SH	2006-05-22	0.72720	0.00001	0.911	0.004	1050
SH	2006-10-02	0.72752	0.00001			1050
SH	Average	0.72757		0.914
Outlet RS	2005-03-29	0.72573	0.00002	0.939	0.003	883
RS	2006-05-22	0.72520	0.00001	0.974	0.004	883
RS	Average	0.72547		0.957
atmopsheric inputs	Average
Rain	2004-2006	0.7111		1.175
Throughfalls spruces	2004-2006	0.71290		1.079
Througfalls beeches	2004-2006	0.71620		0.953
clays SS under beeches	35 cm depth	0.872847	0.00002	1.26	0.003
clays SS under beeches	95 cm depth	0.767439	0.00001	1.074	0.002
clays NS under spruces	35 cm depth	0.830034	0.00001	1.094	0.002
clays NS under spruces	95 cm depth	0.802886	0.00001	nd

## Sheet: Table S3
2004-2006	water fluxes	Na fluxes	K fluxes	Mg fluxes	Ca fluxes	Si fluxes	Sr fluxes	U fluxes
	(mm)	mg/m2/yr	mg/m2/yr	mg/m2/yr	mg/m2/yr	mg/m2/yr	µg/m2/yr	µg/m2/yr
rain - Frain	1247	306	219	56	256	5	1.1	7.6
throughfall - Fthrougfall	1070	1041	3037	256	1034	101	2.4	12.6
biological contribution to throughfalls Cb (1.2.3.4)		0.2	0.9	0.3	0.25	0.1	nd	nd
Atmospheric contribution to throughfall - Fthrougfall(corrected)		832.8	303.7	179.2	775.5	90.9	nd	nd
global atmospheric input (a)	1096	754	291	161	697	78	1.1 to 2.4	7.6 to 12.6
outlet fluxes (b)	850	1634	608	456	2276	3008	8.8	113
rain-corrected outlet fluxes (c)	850	1328	388	399	2019	3003	7.7	105
(wet+dry atmos. deposits)-corrected outlet fluxes (d)	850	880	317	295	1579	2929	7.7 to 6.6	105 to 101

## Sheet: Table S4
		Soils under spruces - Northern slope (1)
depth	SiO2	Al2O3	MgO	CaO	Fe2O3	MnO	TiO2	Na2O	K2O	P2O5	Mg/Ca	Mg/Na	Ca/Na	muscovite	Quartz	K-Feld	plagio	apatite	Smectite	amorph	smectite (%)	OM	pH	Clays	CEC
cm	%	%	%	%	%	%	%	%	%	%				%	%	%	%	%	%	%	in clay fract.	%		%<2µm	cmol/kg
10	72.74	17.84	0.51	0.06	1.92	0.04	0.24	0.62	5.70	0.22	7.56	1.34	0.18	42.2	38.6	10.9	5.4	0.05	3.7	0.68	19.7	7.5	3.7	22.2	15.49
50	64.82	20.71	0.66	0.15	2.43	0.04	0.32	0.85	5.60	0.43	3.65	1.27	0.35	50.1	27.3	5.6	7.5	0.21	5.8	1.09	19.8	9.2	4.4	20.3	11.98
70	65.89	20.59	0.65	0.28	2.12	0.03	0.22	0.99	5.59	0.52	1.95	1.07	0.55	47.5	27.8	7	8.7	0.42	6	1.11		7	4.4	15.8	10.37
90	66.10	20.44	0.70	0.28	2.04	0.02	0.20	0.92	5.71	0.43	2.10	1.24	0.59	45.4	27.4	8.9	8.1	0.43	7.8	0.89		6.3	4.5	12.5	9.78
110	67.17	19.82	0.61	0.30	2.40	0.03	0.20	1.22	5.90	0.47	1.71	0.81	0.47	40.2	27.2	12.8	10.6	0.43	6.4	0.9	27.1	5.1	4.6	8.1	9.79
130	65.25	21.10	0.58	0.39	1.84	0.02	0.22	1.87	5.81	0.49	1.26	0.50	0.40	42.5	22.1	10.7	16.4	0.54	5.1	0.87		5.7	4.7	6.9	9.23
150	65.68	21.82	0.59	0.32	1.86	0.02	0.20	2.04	5.63	0.42	1.52	0.47	0.31	46.5	21.9	7.2	17.8	0.42	4.3	0.7		5.3	4.7	5.1	8.68
170	69.31	20.18	0.60	0.31	1.50	0.03	0.17	1.81	5.77	0.35	1.64	0.54	0.33	39.4	26.9	12.6	15.9	0.41	6.4	0.54		3.8	4.7	4.2	9.76
190	67.17	19.22	0.70	0.28	1.79	0.01	0.27	1.35	5.81	0.32	2.10	0.85	0.40	34.2	25.9	15.5	11.6	0.39	10.2	0.46		6.2	4.6	5.3	15.19
210	68.03	19.31	0.64	0.31	1.42	0.01	0.24	1.37	6.23	0.33	1.73	0.75	0.44	34	25.9	17.9	11.8	0.44	8.5	0.41	47.8	5.6	4.6	5.2	13.94
		Soils under beeches - Southern slope (1)
depth	SiO2	Al2O3	MgO	CaO	Fe2O3	MnO	TiO2	Na2O	K2O	P2O5	Mg/Ca	Mg/Na	Ca/Na	muscovite	Quartz	K-Feld	plagio	apatite	Smectite	amorph	smectite (%)	OM	pH	Clays	CEC
cm	%	%	%	%	%	%	%	%	%	%				%	%	%	%	%	%	%	in clay fract.	%		%<2µm	cmol/kg
4	74.45	14.21	0.33	0.18	1.21	0.01	0.33	1.90	4.77	0.25	1.54	0.28	0.18	18.9	39.5	18.9	14.7	0.15	4.4	0.54	14.7	12	4.0	13.3	7.86
15	72.52	15.87	0.34	0.13	1.27	0.01	0.31	1.85	5.41	0.22	2.23	0.30	0.13	23.9	36.5	20	13.6	0.1	3.8	0.41		6.7	4.1	11.6	7.7
35	69.10	15.98	0.35	0.10	2.16	0.04	0.29	1.70	4.96	0.60	2.99	0.34	0.11	23.1	35.1	17.8	12.5	0.05	4.3	2.14		12.3	4.6	10.7	8.00
52.5	66.96	17.53	0.40	0.13	2.52	0.05	0.31	1.81	4.98	0.45	2.65	0.36	0.14	26.3	31.7	15.9	13.4	0.1	5	2.7	22.2	11.9	4.8	8.7	5.02
77.5	65.03	18.61	0.47	0.16	2.85	0.06	0.30	1.91	4.96	0.57	2.46	0.40	0.16	28.7	28.6	14.4	14.3	0.15	6.1	2.89		10.9	4.8	6.3	4.24
100	66.10	18.82	0.55	0.22	2.39	0.08	0.36	1.67	5.24	0.40	2.14	0.53	0.25	31	29.5	14.7	11.8	0.27	7.6	1.63	27.7	7.7	4.8	4.2	4.08
122.5	65.25	19.48	0.56	0.26	1.96	0.08	0.29	1.83	5.34	0.42	1.83	0.50	0.27	33.4	27.3	13.9	13.1	0.33	7.4	1.22		7.5	4.8	3.1	3.6
150	63.54	20.46	0.55	0.32	2.72	0.11	0.28	2.22	5.52	0.45	1.45	0.40	0.28	33.8	22.7	14.8	16.6	0.4	7.1	1.43		6	4.9	2.5	2.6
177.5	64.82	19.35	0.48	0.26	2.85	0.10	0.24	2.47	5.48	0.41	1.56	0.32	0.20	28.1	23.3	17.9	19.1	0.28	6.5	1.17		5.2	4.9	1.8	2.12
177.5	65.89	18.31	0.45	0.29	2.83	0.10	0.28	2.44	5.36	0.44	1.30	0.30	0.23	24	25.3	19.5	19	0.33	6.5	1.19		5.1	4.9	1.6	1.79
200	62.25	20.22	0.55	0.33	3.73	0.15	0.33	2.59	5.04	0.52	1.39	0.34	0.25	31.9	20.9	12.7	20.2	0.39	7.4	1.48	19.8	6.2	4.9	2.1	1.79
	Soils - Gneiss (2)
depth	SiO2	Al2O3	MgO	CaO	Fe2O3	MnO	TiO2	Na2O	K2O	P2O5	Mg/Ca	Mg/Na	Ca/Na	muscovite	Quartz	K-Feld	plagio	apatite
cm	%	%	%	%	%	%	%	%	%	%				%	%	%	%	%
30	62.84	15.25	1.00	0.20	5.72	0.15	0.77	0.42	3.44	0.43	4.22	3.87	0.92	nd	nd	nd	nd	nd
65	69.61	15.20	1.35	0.13	5.27	0.09	0.71	0.38	3.93	0.24	8.77	5.77	0.66	nd	nd	nd	nd	nd
135	68.00	15.41	1.22	0.09	5.99	0.09	0.70	0.25	4.23	0.23	11.44	7.93	0.69	nd	nd	nd	nd	nd
175	71.88	15.61	1.02	0.24	3.11	0.04	0.56	0.05	4.71	0.23	3.59	33.16	9.24	nd	nd	nd	nd	nd
225	64.97	16.11	0.86	0.12	9.26	0.16	0.59	0.10	4.69	0.19	6.05	13.98	2.31	nd	nd	nd	nd	nd
		Bedrock - average value (1), (2), this study
	SiO2	Al2O3	MgO	CaO	Fe2O3	MnO	TiO2	Na2O	K2O	P2O5	Mg/Ca	Mg/Na	Ca/Na	muscovite	Quartz	K-Feld	plagio	apatite
cm	%	%	%	%	%	%	%	%	%	%				%	%	%	%	%
Northern slope	75.38	14.50	0.45	0.29	1.38	0.03	0.19	0.98	6.19	0.31	1.31	0.75	0.57	29	49	19	2	0.5
Southern slope	74.13	14.32	0.26	0.36	0.98	0.01	0.18	2.87	5.70	0.33	0.61	0.15	0.24	13	34	30	22	0.5
Gneiss	65.08	17.95	2.55	0.20	7.59	0.07	0.89	0.55	4.13	0.12	10.63	7.54	0.71	nd	nd	nd	nd	nd
